# Supplementary material for: Effect of substituents in a series of carbazole-based host-materials toward high-efficiency carbene-based blue OLEDs
Source: Royal Society of Chemistry journal article supplement (doi:10.1039/c6tc03067j), 2016-01-01
Supplement: c6tc03067j1.pdf [file c6tc03067j1.pdf]

## Supporting information

### **Effect of Substituents in a Series of Carbazole-based Host Materials toward High-Efficiency Carbene-based Blue OLEDs**

*Yuji Nagai,<sup>a</sup> Hisahiro Sasabe,<sup>\*a,b</sup> Satoru Ohisa,<sup>\*a,b</sup> and Junji Kido<sup>\*a,b</sup>*

*a. Department of Organic Device Engineering, Graduate School of Science and Engineering, Yamagata University, Yonezawa, Yamagata, 992-8510 Japan.*

*b. Research Center for Organic Electronics (ROEL), Yamagata University, Yonezawa, Yamagata, 992-8510 Japan.*

*E-mail: h-sasabe@yz.yamagata-u.ac.jp; kid@yz.yamagata-u.ac.jp*

## 1. DFT calculations

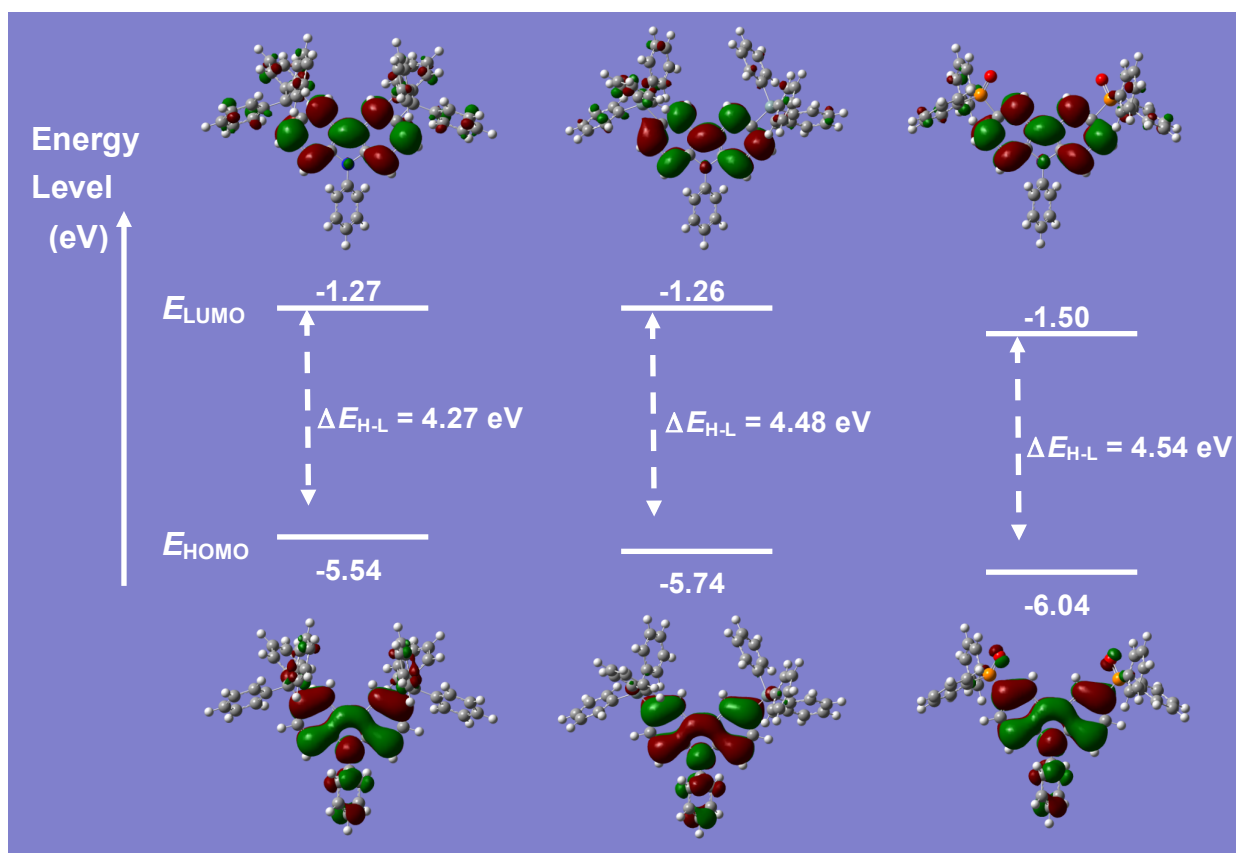

**Figure S1.** The optimized structures and the spatial distributions of the HOMOs and

LUMOs for the carbazole based hosts, as calculated at the

RB3LYP/6-311+G(d,p)//RB3LYP/6-31G(d,p) level.

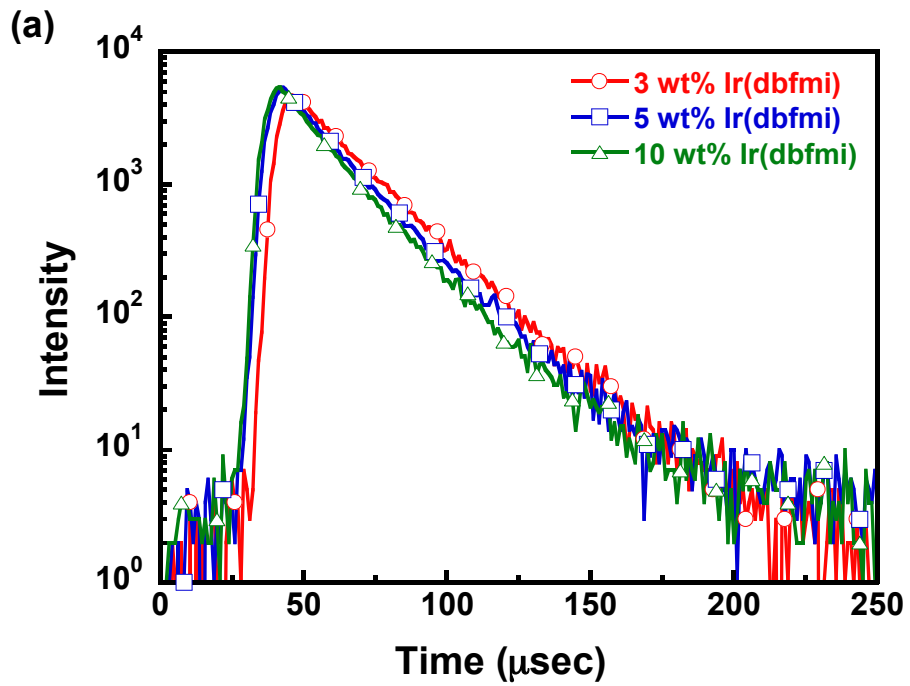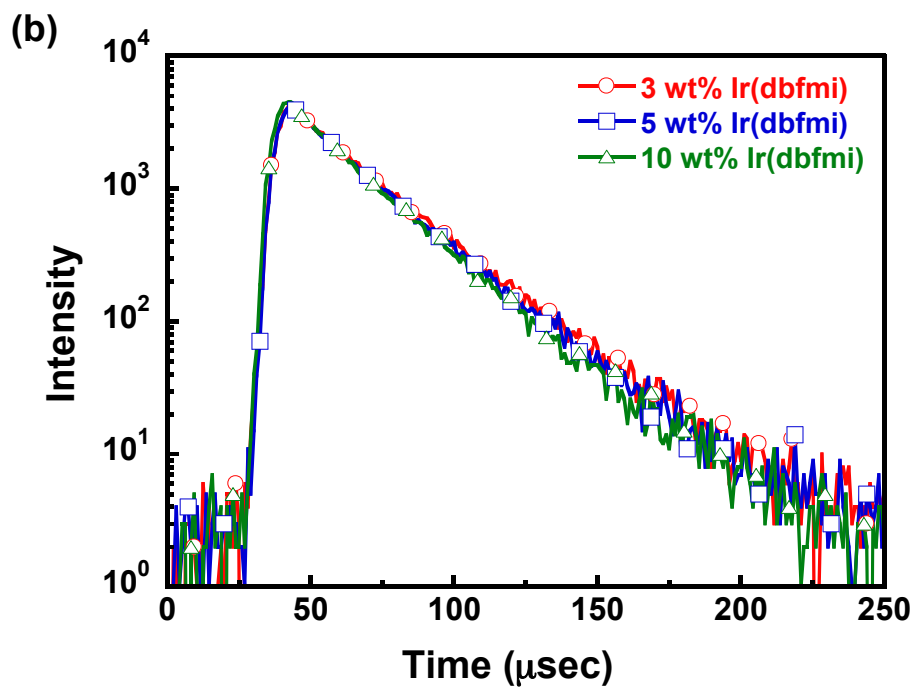

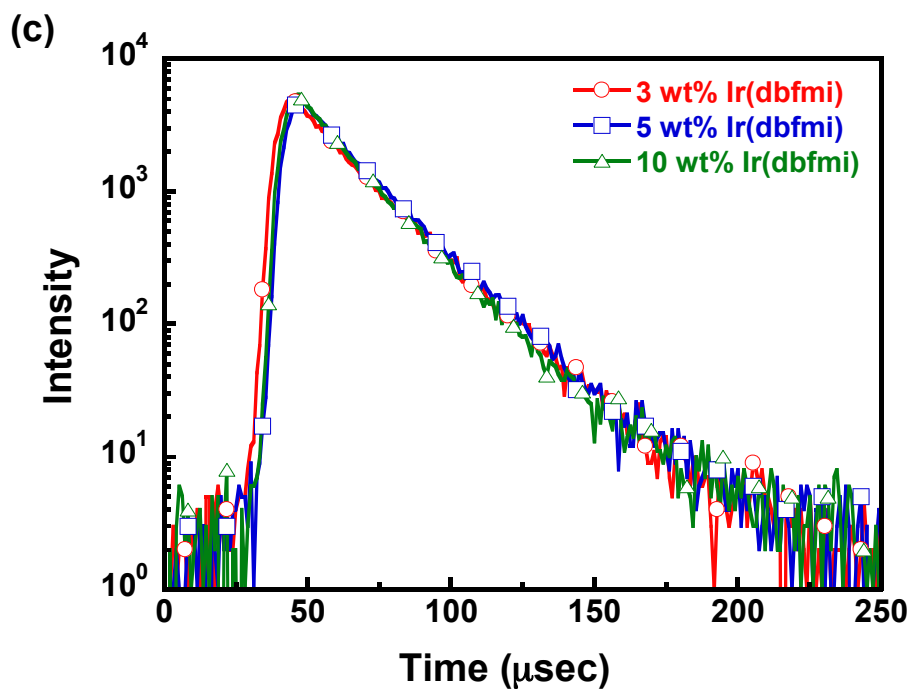

**Fig. S2** Phosphorescent decay curves of co-deposited film depending on doping concentration. (a)CCz, (b)SiCz, (c)PO9.

**Table S1** Phosphorescent lifetime of co-deposited film depending on doping concentration.

| Host | 3 wt%       |            |                   |                      | 5 wt%       |            |                   |                      | 10 wt%      |            |                   |                      |
|------|-------------|------------|-------------------|----------------------|-------------|------------|-------------------|----------------------|-------------|------------|-------------------|----------------------|
|      | $\eta_{PL}$ | $\tau_p$   | $k_r \times 10^5$ | $k_{nr} \times 10^5$ | $\eta_{PL}$ | $\tau_p$   | $k_r \times 10^5$ | $k_{nr} \times 10^5$ | $\eta_{PL}$ | $\tau_p$   | $k_r \times 10^5$ | $k_{nr} \times 10^5$ |
|      | [%]         | [ $\mu$ s] | [ $s^{-1}$ ]      | [ $s^{-1}$ ]         | [%]         | [ $\mu$ s] | [ $s^{-1}$ ]      | [ $s^{-1}$ ]         | [%]         | [ $\mu$ s] | [ $s^{-1}$ ]      | [ $s^{-1}$ ]         |
| CCz  | 61          | 21.4       | 0.28              | 0.18                 | 54          | 19.6       | 0.27              | 0.23                 | 49          | 18.1       | 0.27              | 0.28                 |
| SiCz | 75          | 25.6       | 0.29              | 0.098                | 75          | 24.9       | 0.30              | 0.10                 | 63          | 23.9       | 0.26              | 0.15                 |
| PO9  | 72          | 21.2       | 0.34              | 0.13                 | 71          | 21         | 0.34              | 0.14                 | 59          | 19.6       | 0.30              | 0.20                 |

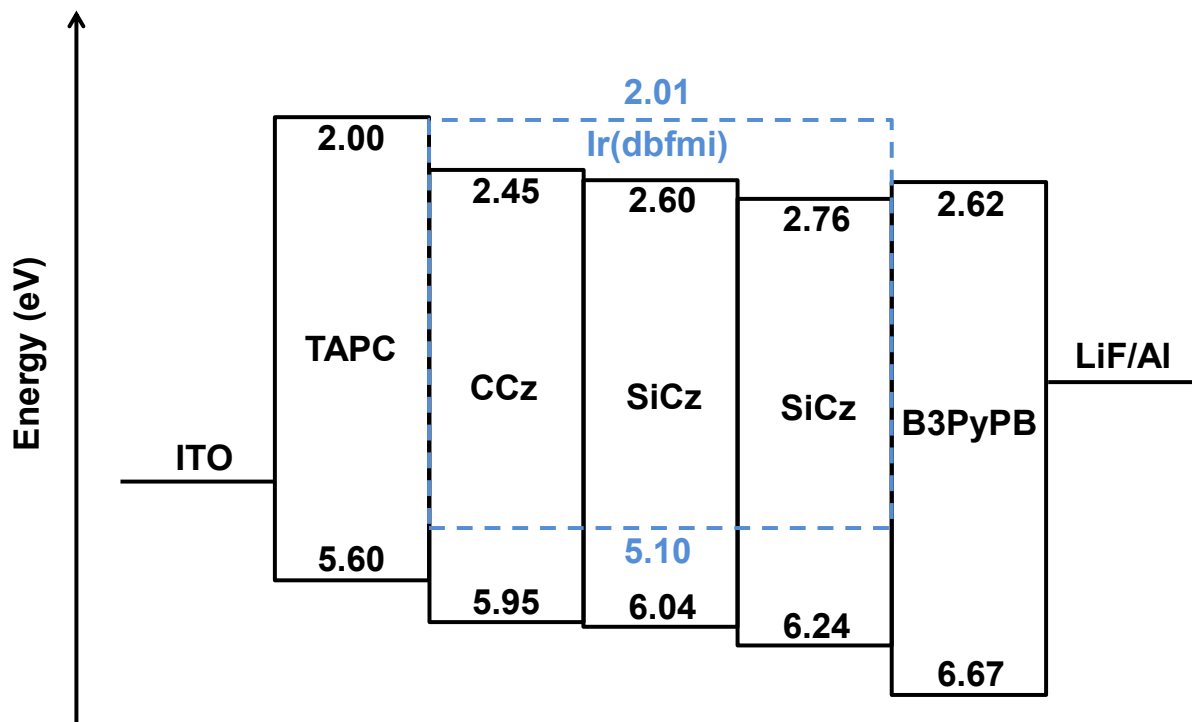

Figure S3. Energy diagram of deep blue phosphorescent organic LED.

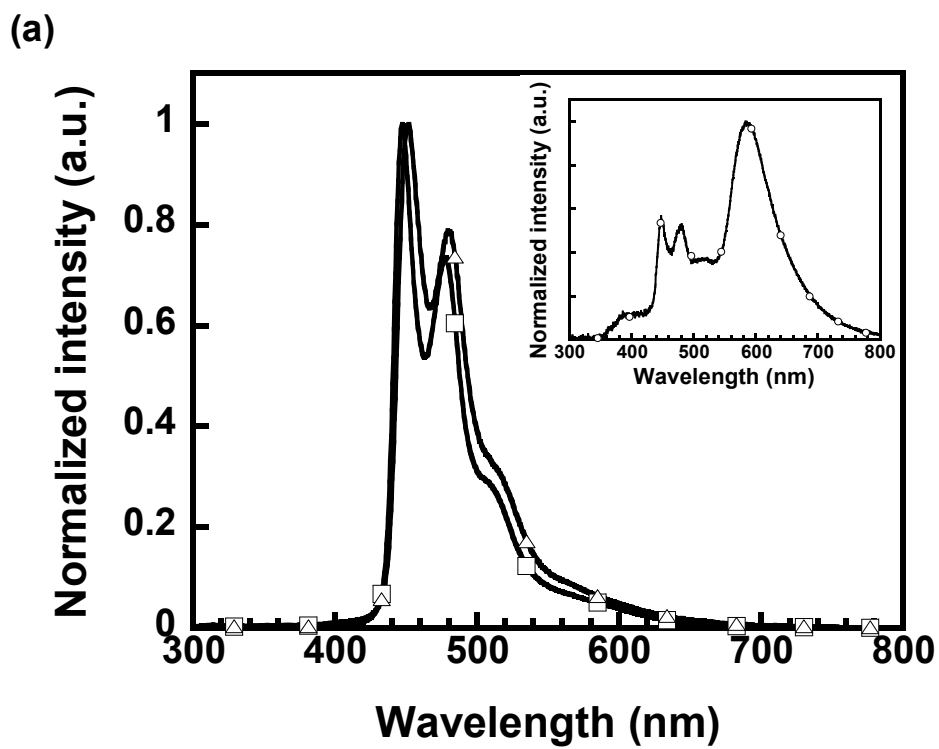

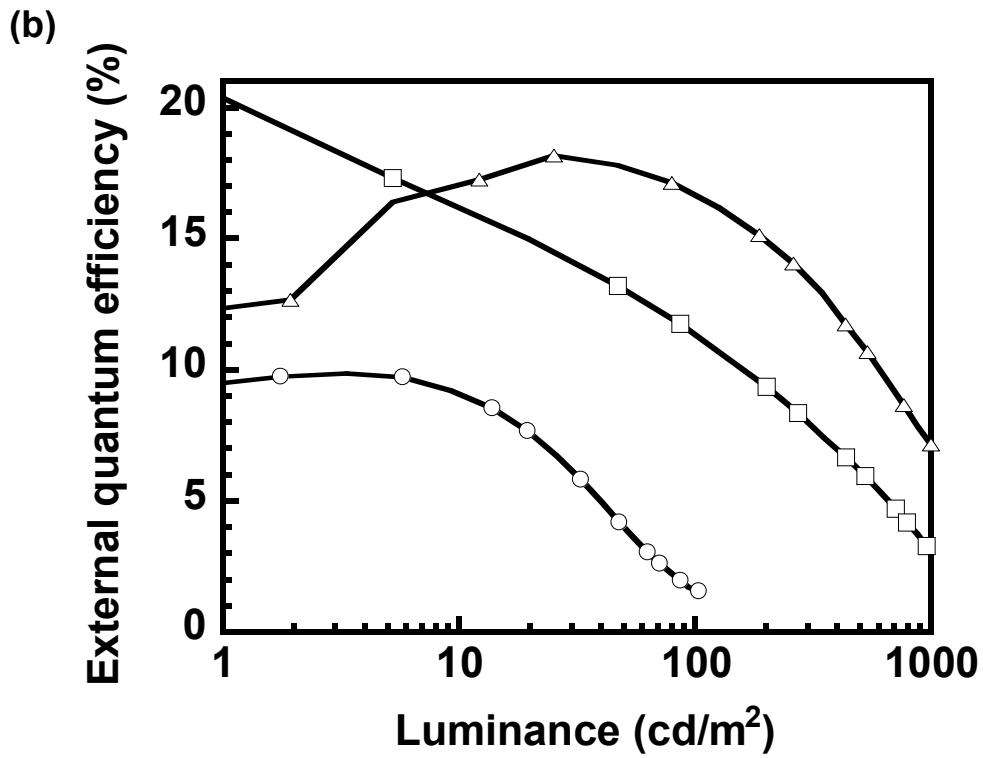

**Fig. S3** (a) EL spectra at 1mA. Inset: EL spectrum of CCz based OLED. (b)  $\eta_{\text{ext}}-L$  characteristics of deep blue OLEDs using CCz (circle), SiCz (square) and PO9 (triangle), respectively.
